# Supplementary material for: Wheel-shaped molybdenum(v) cobalt-phosphate cluster as a highly sensitive bifunctional photoelectrochemical sensor for the trace determination of Cr(vi) and tetracycline
Source: Royal Society of Chemistry journal article supplement (doi:10.1039/d2qi01936a), 2022-01-01
Supplement: d2qi01936a1.pdf [file d2qi01936a1.pdf]

Supporting Information for

**Wheel-shaped molybdenum(V) cobalt-phosphate cluster as highly sensitive bifunctional photoelectrochemical sensor for the trace determination of Cr(VI) and tetracycline**

Xiu-Juan Zhang, Yuan-Yuan Ma,\* Hao-Xue Bi, Xiao-Yu Yin, Hao Song, Man-Hui Liu, Zhan-Gang Han\*

Hebei Key Laboratory of Organic Functional Molecules; National Demonstration Center for Experimental Chemistry Education; College of Chemistry and Materials Science, Hebei Normal University, Shijiazhuang, Hebei 050024, Hebei 050024, P. R. China.

\*Corresponding author email: mayy334@hebtu.edu.cn; hanzg116@126.com.

**CONTENTS**

1. Experimental sections
2. Supplementary structural figures
3. Supplementary tables

## 1. Experimental section

### 1.1. Chemicals

All chemical reagents were obtained through commercial channels, and were used as received. Ultrapure water (18.25 MΩ cm) was obtained from a Sichuan-water-purifier physical and chemical analysis type water purifier (Sichuan, China) was used throughout the experiments unless otherwise noted. An aqueous solution of hexavalent chromium ions and tetracycline hydrochloride were prepared from potassium dichromate in ultrapure water. The lake water was first filtered to remove large particulate solid impurities and then acidified with H<sub>2</sub>SO<sub>4</sub> to the pH equal to 0.3 (same as the pH of the 0.5 M H<sub>2</sub>SO<sub>4</sub> electrolyte). [(Mo<sub>2</sub>O<sub>4</sub>)<sub>8</sub>(HPO<sub>4</sub>)<sub>14</sub>(PO<sub>4</sub>)<sub>10</sub>{Co<sub>19</sub>Na<sub>4</sub>(H<sub>2</sub>O)<sub>34</sub>}]·14 H<sub>2</sub>O (abbr. Co<sub>16</sub>Mo<sub>16</sub>P<sub>24</sub>) was synthesized according to the previous reports.<sup>1</sup>

### 1.2. Synthesis of hybrid 1

A mixture of Na<sub>2</sub>MoO<sub>4</sub>·2H<sub>2</sub>O (0.10 g, 0.49 mmol), BBTZ (0.04 g, 0.17 mmol), CoCl<sub>2</sub>·6H<sub>2</sub>O (0.20 g, 0.84 mmol), H<sub>3</sub>PO<sub>4</sub> (0.50 mL, 7.50 mmol), and H<sub>2</sub>O (8.00 mL, 0.44 mol) was stirred for 30 min, and the pH was adjusted to 2.0 with NaOH. The mixture was then transferred to a Teflon-lined reactor and kept at 160 °C for 5 days. After the reactor was cooled to room temperature at a rate of 10 °C·h<sup>-1</sup>, red bulk crystals of hybrid 1 was obtained, washed with distilled water and air dried to give a yield of 57% (based on Mo) (Fig. S1).

### 1.3. Instruments and measurements

The FT-IR spectrum (KBr precipitation) in the range of 4000~400 cm<sup>-1</sup> was recorded with an FTIR-8900 infrared spectrometer. Powder X-ray diffraction (XRD) was performed on a Bruker AXSD8 Advance diffractometer. Scanning electron microscope images and Energy-dispersive spectroscopy (EDS) were conducted on a cold field emission scanning electron microscope (S-4800). Thermogravimetric (TG) analysis was carried out with a PerkinElmer Pyris Diamond TG Instruments. The UV-vis diffuse-reflectance spectroscopy (UV-vis DRS) spectra were characterized using an Agilent Cary 5000 UV-vis spectrophotometer with barium sulfate (BaSO<sub>4</sub>) as the standard. All photoelectrochemical tests were completed using CHI760E workstation.

### 1.4. X-ray crystallography

Reliable diffraction data were collected using a Bruker APEX-II CCD diffractometer with Mo Kα monochromated radiation (λ = 0.71073 Å) at 296(2) K. Using Olex2<sup>2</sup>, the structure was solved with the SHELXT<sup>3</sup> structure solution

program using Intrinsic Phasing and refined with the SHELXL<sup>4</sup> refinement package using Least Squares minimisation. The CCDC codes are 2178098 for hybrid **1** Experimental sections

### **1.5. Electrochemical detection of Cr(VI) and tetracycline**

All the electrochemical detection experiments were conducted on the CHI760E electrochemical workstation using a three-electrode system in 0.5 M H<sub>2</sub>SO<sub>4</sub> (pH = 0). Cyclic voltammetry (CV) and electrochemical impedance spectroscopy (EIS) were used to characterize the electrochemical properties of hybrid **1**. EIS of the hybrid was tested at a frequency of 100 kHz to 1 Hz. The differential pulse voltammetry (DPV) technique was used to evaluate the electrochemical Cr(VI) and TC detection performance. For Cr(VI) detection, the potential window was set in the range of -0.1 ~ 0.8 V with amplitude of 50 mV. For TC detection, the potential window was in the range of -0.1 ~ 0.8 V with amplitude of 50 mV. The limit of detection of hybrid **1** was calculated according to the principle of  $S/N = 3$ . The relative standard deviation was calculated by using 15 cycles blank experiments. The detection sensitivity was obtained by linearly fitting the curves of Cr(VI)/TC concentration and corresponding peak currents. The actual water sample is first filtered out of impurities and then acidified as electrolyte for the photoelectrochemical detection experiments. The concentrations of added test substance (Cr(VI) and TC) range from 0.1 μM to 1.0 μM.

### **1.6. Preparation of working electrodes modified with hybrid 1**

Before each experiment, the glass carbon electrode (GCE, diameter 3 mm) was polished on a polishing pad with 0.3 and 0.05 μm alumina powders. The cleaned GCE electrode was dried with nitrogen stream for the next modification. 12 mg of crystal was first mixed and grinded with carbon black under mass ratios of 1:2, and then dispersed into 200 μL of 0.5 wt% Nafion solution and ultrasonicated for 30 min to obtain a uniformly dispersed solution. Then, 12 μL of catalyst suspension was dropped on the surface of GCE electrodes and dried in air for testing. The Nafion solution acts as adhesive and the protecting agent to ensure that the hybrids catalysts can be tightly modified on the surface of GCE electrode.

## 2. Supplementary structural figures

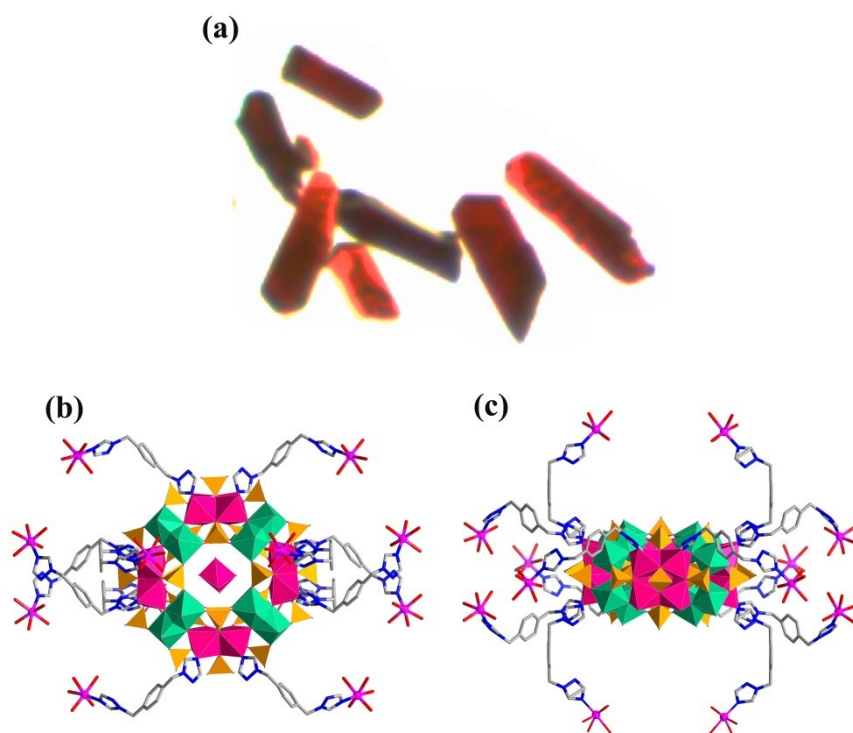

**Figure S1** (a) The optical picture of hybrid **1**; (b-c) The twelve node positive representation of wheel-shaped  $\{\text{Co}_{16}\text{Mo}_{16}\text{P}_{24}\}$  cluster in hybrid **1**.

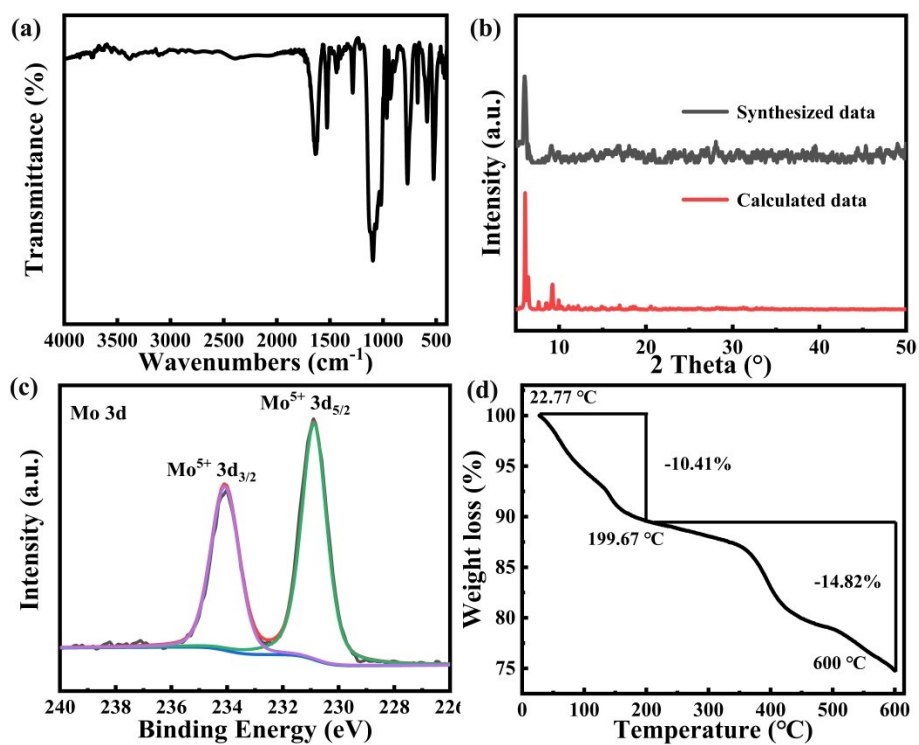

**Figure S2** (a) IR spectrum of **1** showing the organic components; (b) The simulated and calculated XRD patterns of crystal **1**; (c) The high-resolution XPS spectrum of Mo in hybrid **1**; (d) The TG curves of hybrid **1** shows two weight loss steps corresponding to the loss of water molecules and organic species, and the weight loss is almost consistent with the weight loss calculated according to the crystal structure.

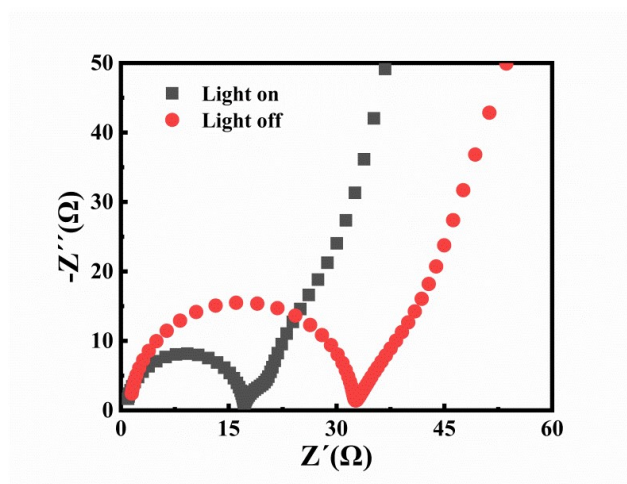

**Figure S3** EIS spectra of hybrid **1** in dark and light-irradiation condition.

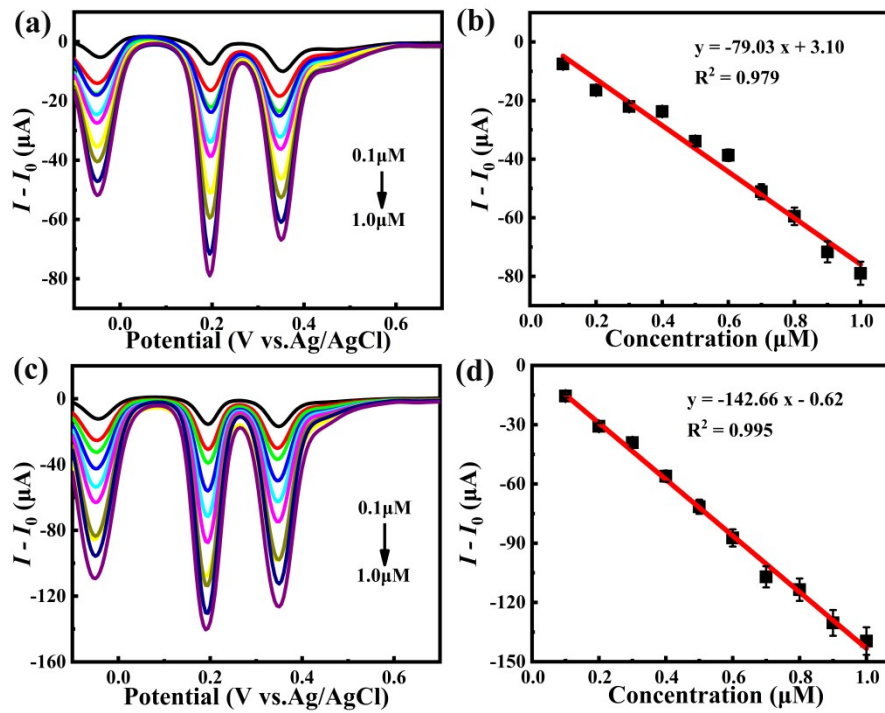

**Figure S4** (a) DPV curves of {Co<sub>16</sub>Mo<sub>16</sub>P<sub>24</sub>} cluster modified electrodes in 0.5 M H<sub>2</sub>SO<sub>4</sub> with continuous additions of Cr(VI) under dark condition; (b) The corresponding linear dependences; (c) DPV curves of {Co<sub>16</sub>Mo<sub>16</sub>P<sub>24</sub>} cluster in 0.5 M H<sub>2</sub>SO<sub>4</sub> with the successive changes of 0.1 and 1.0 μM Cr(VI) under visible light illumination; (d) The linear dependence curve of {Co<sub>16</sub>Mo<sub>16</sub>P<sub>24</sub>} cluster.

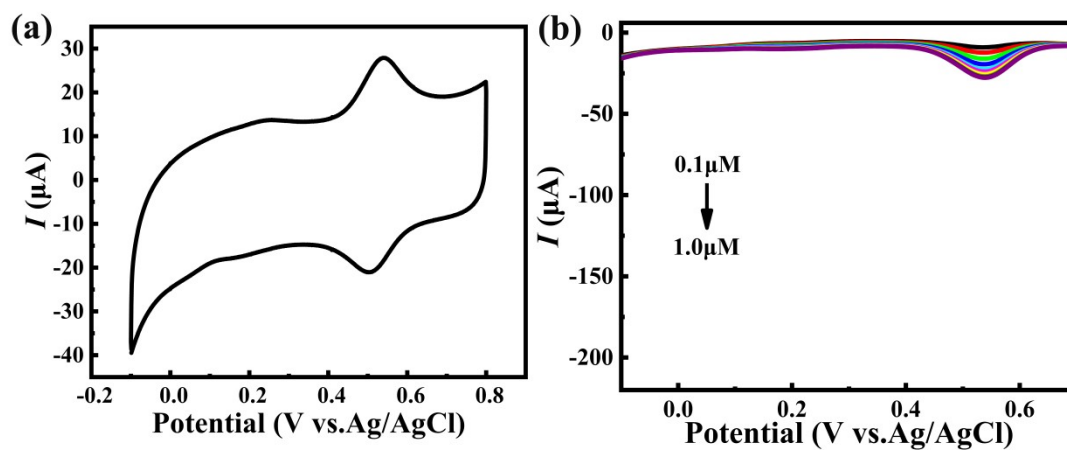

Figure S5 (a) CV curve of BBTZ ligand. (b) DPV curves of BBTZ ligand in 0.1-1.0  $\mu\text{M}$  Cr(VI).



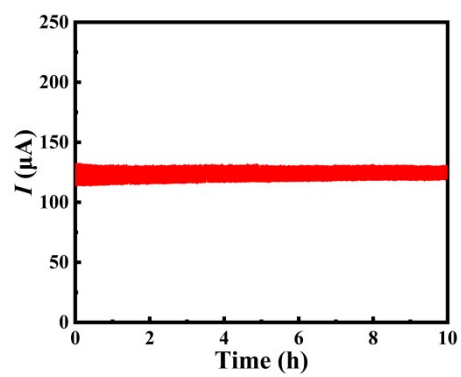

**Figure S6** Amperometric responses for compound **1** to 50 μM Cr(VI) in 0.5 M H<sub>2</sub>SO<sub>4</sub> electrolyte.

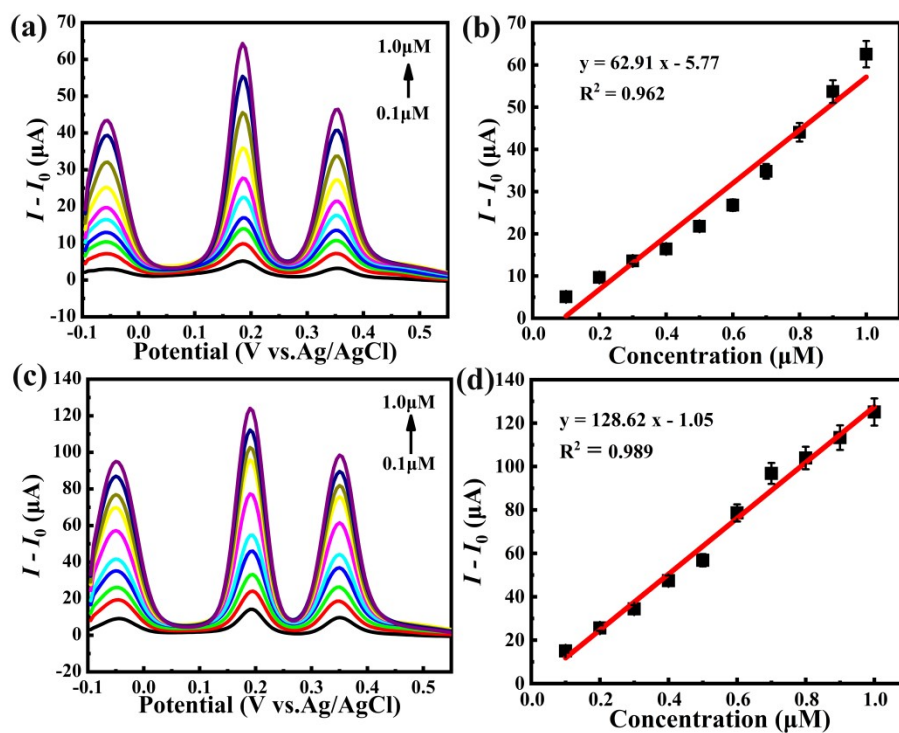

**Figure S7** (a) DPV curves of {Co<sub>16</sub>Mo<sub>16</sub>P<sub>24</sub>} cluster modified electrodes in 0.5 M H<sub>2</sub>SO<sub>4</sub> with continuous additions of TC under dark condition; (b) Corresponding linear dependence plot of {Co<sub>16</sub>Mo<sub>16</sub>P<sub>24</sub>} cluster; (c) DPV curves of {Co<sub>16</sub>Mo<sub>16</sub>P<sub>24</sub>} cluster in 0.5 M H<sub>2</sub>SO<sub>4</sub> with the addition of 0.1 and 1.0 μM TC under visible light illumination; (d) Corresponding linear dependence plot under the visible light illumination.

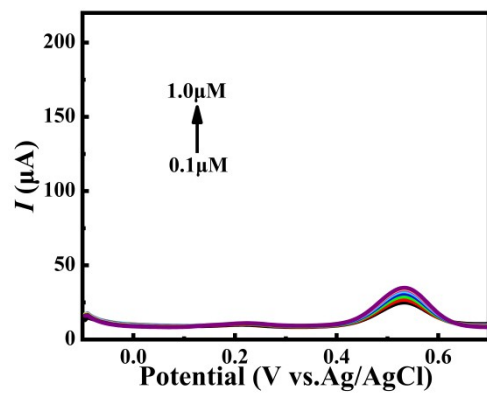

Figure S8 DPV curves of BBTZ ligand with 0.1-1.0  $\mu\text{M}$  TC.

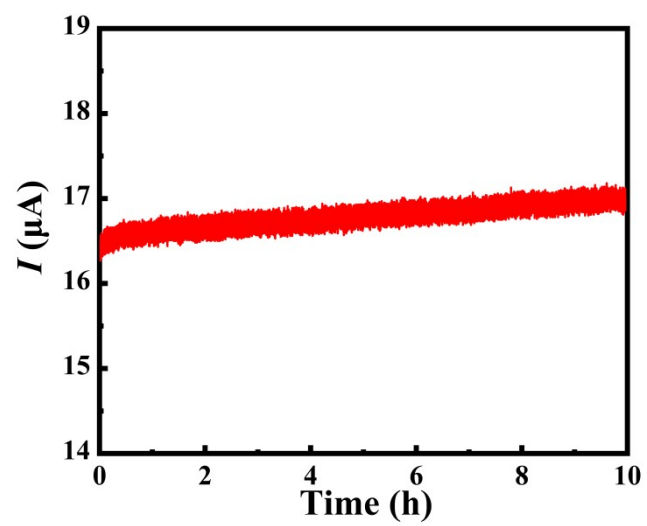

**Figure S9** Amperometric responses for compound 1 to 50μM TC in 0.5 M H<sub>2</sub>SO<sub>4</sub> electrolyte.

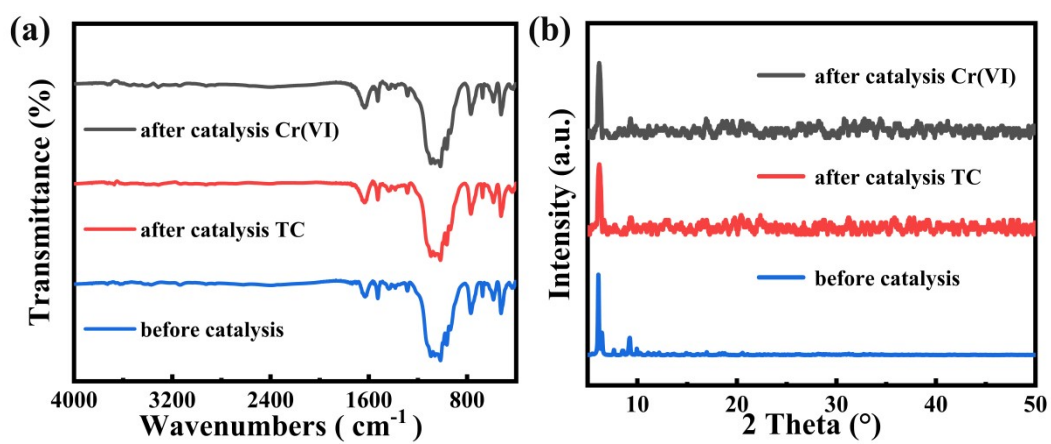

Figure S10 Comparisons of IR (a) and XRD (b) of compound **1** before and after catalysis reaction.

### 3. Supplementary structural tables

**Table S1.** Crystal data and structure refinement for Compound **1**

| Hybrid                                             | <b>1</b>                                                                                                           |
|----------------------------------------------------|--------------------------------------------------------------------------------------------------------------------|
| Empirical formula                                  | C <sub>72</sub> H <sub>80</sub> Co <sub>17</sub> Mo <sub>16</sub> N <sub>36</sub> O <sub>142</sub> P <sub>24</sub> |
| Formula weight                                     | 7001.85                                                                                                            |
| Crystal system                                     | triclinic                                                                                                          |
| Space group                                        | P-1                                                                                                                |
| <i>a</i> (Å)                                       | 16.106(18)                                                                                                         |
| <i>b</i> (Å)                                       | 19.486(20)                                                                                                         |
| <i>c</i> (Å)                                       | 21.27(2)                                                                                                           |
| $\alpha, \beta, \gamma$ (°)                        | 107.40(2), 101.00(3), 113.34(3)                                                                                    |
| Volume (Å <sup>3</sup> ), <i>Z</i>                 | 5474(10), 1                                                                                                        |
| Density (calculated)                               | 2.124                                                                                                              |
| Reflections collected                              | 27091                                                                                                              |
| <i>F</i> (000)                                     | 3391.0                                                                                                             |
| Crystal size (mm <sup>3</sup> )                    | 0.2×0.15×0.13                                                                                                      |
| Goodness-of-fit on <i>F</i> <sup>2</sup>           | 1.115                                                                                                              |
| Final <i>R</i> indices [ <i>I</i> >2σ( <i>I</i> )] | <i>R</i> <sub>1</sub> = 0.1163, <i>wR</i> <sub>2</sub> = 0.3016                                                    |
| <i>R</i> indices (all data)                        | <i>R</i> <sub>1</sub> = 0.1506, <i>wR</i> <sub>2</sub> = 0.3342                                                    |

$$R_1 = \sum ( |F_o| - |F_c| ) / \sum |F_o| ; wR_2 = \{ \sum [ w ( |F_o|^2 - |F_c|^2 )^2 ] / \sum [ w ( |F_o|^2 )^2 ] \}^{1/2}.$$

**Table S2.** The selected bond lengths (Å) of hybrid **1**

|                          |           |                            |           |
|--------------------------|-----------|----------------------------|-----------|
| Mo1-Mo14                 | 2.611(4)  | Co9-N1                     | 2.37(4)   |
| Mo1-O8                   | 1.918(14) | Co10-O10                   | 2.040(14) |
| Mo1-O10                  | 1.949(14) | Co10-O14 <sup>1</sup>      | 2.115(14) |
| Mo1-O28                  | 2.061(15) | Co10-O20 <sup>1</sup>      | 2.091(14) |
| Mo1-O62 <sup>1</sup>     | 2.087(14) | Co10-N1                    | 2.106(19) |
| Mo2-Mo3                  | 2.66(3)   | Co11-P2                    | 2.65(4)   |
| Mo9-O54                  | 2.24(2)   | P1-O16                     | 1.513(14) |
| Mo10-O24                 | 2.015(14) | P1-O38                     | 1.525(14) |
| Mo10-O27                 | 2.385(14) | P1-O45                     | 1.601(14) |
| Co2-O11                  | 1.63(4)   | N16-C35                    | 1.44(3)   |
| Co2-O15                  | 1.98(4)   | N17-C31                    | 1.29(3)   |
| Co3-O55                  | 2.30(3)   | C1-C23                     | 1.42(3)   |
| Co3-N4                   | 2.41(3)   | C2-C6                      | 1.32(3)   |
| O10-Mo1-O62 <sup>1</sup> | 88.4(6)   | O6-Co12-O19                | 99.0(6)   |
| O22-Mo1-Mo14             | 89.9(4)   | O6-Co12-O23                | 170.9(6)  |
| O21-Mo2-P4               | 104.8(10) | O20-Co13-O49               | 145.9(15) |
| O57-P4-Mo2               | 110.4(8)  | N10 <sup>2</sup> -Co14-O19 | 100.7(7)  |

<sup>1</sup>1-X, 1-Y, -Z.

**Table S3.** The selected bond angles (°) of compound **1**

|                                 |            |                  |           |
|---------------------------------|------------|------------------|-----------|
| Mo2-P4-O40-Co3                  | -9(3)      | O42-P7-O58-Mo14  | -70.4(13) |
| Mo3-Mo2-O56-P4                  | -6(4)      | O42-P7-O58-Mo21  | -69.7(13) |
| Mo7-P4-O56-Mo23                 | 169.7(15)  | O42-P7-O58-Mo22  | -83(2)    |
| Mo9-Mo19-O18-P12                | -60(2)     | O43-Mo3-O6-Mo2   | -93.5(14) |
| Co9-N1-C8-N5                    | 178.4(18)  | O47-Mo24-O4-Mo18 | -65.9(14) |
| Co9-N1-C31-N17                  | -174(2)    | O47-Mo24-O12-P8  | -80.6(18) |
| Co14 <sup>1</sup> -N10-C27-N11  | -158.9(17) | O50-Mo3-O6-Mo2   | 2.2(15)   |
| Co15 <sup>4</sup> -P10-O34-Co24 | 47.9(16)   | O50-Mo11-O60-P12 | 48(3)     |
| O2-P2-O72-Mo20                  | -167.5(15) | O56-P4-O40-Co12  | -20.6(14) |
| O3-Mo21-O8-Mo7                  | 89.9(14)   | O56-P4-O40-Co18  | 149.5(10) |
| O41-Mo15-O48-Mo20               | -84(2)     | C31-N1-C8-N5     | 7(3)      |
| O41-Mo15-O48-Co2                | 70(4)      | C33-N4-C11-N9    | -9(3)     |
| O42-P7-O15-Co2                  | -31.0(18)  | C34-C4-C20-C28   | 1(4)      |
| O42-P7-O15-Co6                  | -12.7(13)  | C35-N16-C24-N6   | 172(2)    |

<sup>1</sup>2-X, 2-Y, 1-Z; <sup>4</sup>1-X, 1-Y, -Z.



**Table S4.** BVS calculation results of atoms.

| Hybrid | Mo1  | Mo2  | Mo3  | Mo4  | Mo5  | Mo6  | Mo7  | Mo8  |
|--------|------|------|------|------|------|------|------|------|
| 1      | 5.47 | 5.55 | 5.14 | 5.75 | 5.35 | 5.31 | 5.41 | 5.24 |

**Table S5.** Peak potential data (mV) for **1** at a sweep rate of 110 mV s<sup>-1</sup>.

| Scan rate              | Ea/Ec (I) / mV   | Ea/Ec (II) / mV  | Ea/Ec (III) / mV |
|------------------------|------------------|------------------|------------------|
| 110 mV s <sup>-1</sup> | E <sub>1/2</sub> | E <sub>1/2</sub> | E <sub>1/2</sub> |
| Hybrid 1               | 106/-273         | 255/-251         | 246/-214         |
|                        | 189.5            | 253              | 230              |

Concretely, the possible reaction for each reversible redox peaks are as follows:<sup>5, 6</sup>

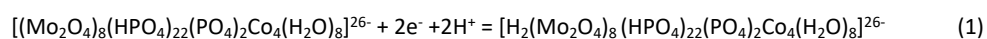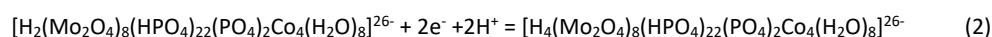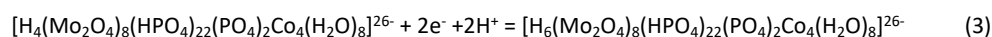

## References

1. C. du Peloux, A. Dolbecq, P. Mialane, J. Marrot, E. Rivière and F. Sécheresse, A New Family of Layered Molybdenum(V) Cobalto-Phosphates Built up of [H<sub>14</sub>(Mo<sub>16</sub>O<sub>32</sub>)Co<sub>16</sub>(PO<sub>4</sub>)<sub>24</sub>(H<sub>2</sub>O)<sub>20</sub>]<sub>10</sub>-Wheels, *Angew. Chem. Int. Ed.*, 2001, **40**, 2455-2457.
2. O. V. Dolomanov, L. J. Bourhis, R. J. Gildea, J. A. K. Howard and H. Puschmann, Olex2: a complete structure solution, refinement and analysis program, *J Appl Crystallogr*, 2009, **42**, 339-341.
3. G. Sheldrick, Shelxt - Integrated space-group and crystal-structure determination, *Acta crystallographica. Section A*, 2015, **71**, 3-8.
4. G. Sheldrick, Crystal structure refinement with shelxt, *Acta Crystallogr. C*, 2015, **71**, 3-8.
5. U. Kei, I. Atuko, I. Eiki and T. Nobuyuki, Catalytic effects of chlorate ions on the electrode reaction processes of 12-molybdophosphate and 12-molybdosilicate, *Bull. Chem. Soc. Jpn*, 1984, **57**, 597-598.
6. L. Duan, F. Liu, X. Wang, E. Wang, C. Qin, Y. Li, X. Wang and C. Hu, A new 3D cadmium molybdenum phosphate with intersecting tunnels: hydrothermal synthesis, structure and electrochemical properties of [C<sub>3</sub>H<sub>12</sub>N<sub>2</sub>]<sub>4</sub>[CdMo<sub>12</sub>O<sub>24</sub>(HPO<sub>4</sub>)<sub>6</sub>(PO<sub>4</sub>)<sub>2</sub>(OH)<sub>6</sub>][[Cd(H<sub>2</sub>O)<sub>2</sub>]<sub>3</sub>·3H<sub>2</sub>O, *J MOL STRUCT*, 2004, **705**, 15-20.
